# Supplementary material for: Sodium and Potassium Intake and Cardiovascular Disease in Older People: A Systematic Review
Source: MDPI journal article supplement (doi:10.3390/nu12113447), 2020-11-10
Supplement: s1 [file s1]

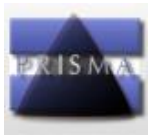

## PRISMA 2009 Flow Diagram

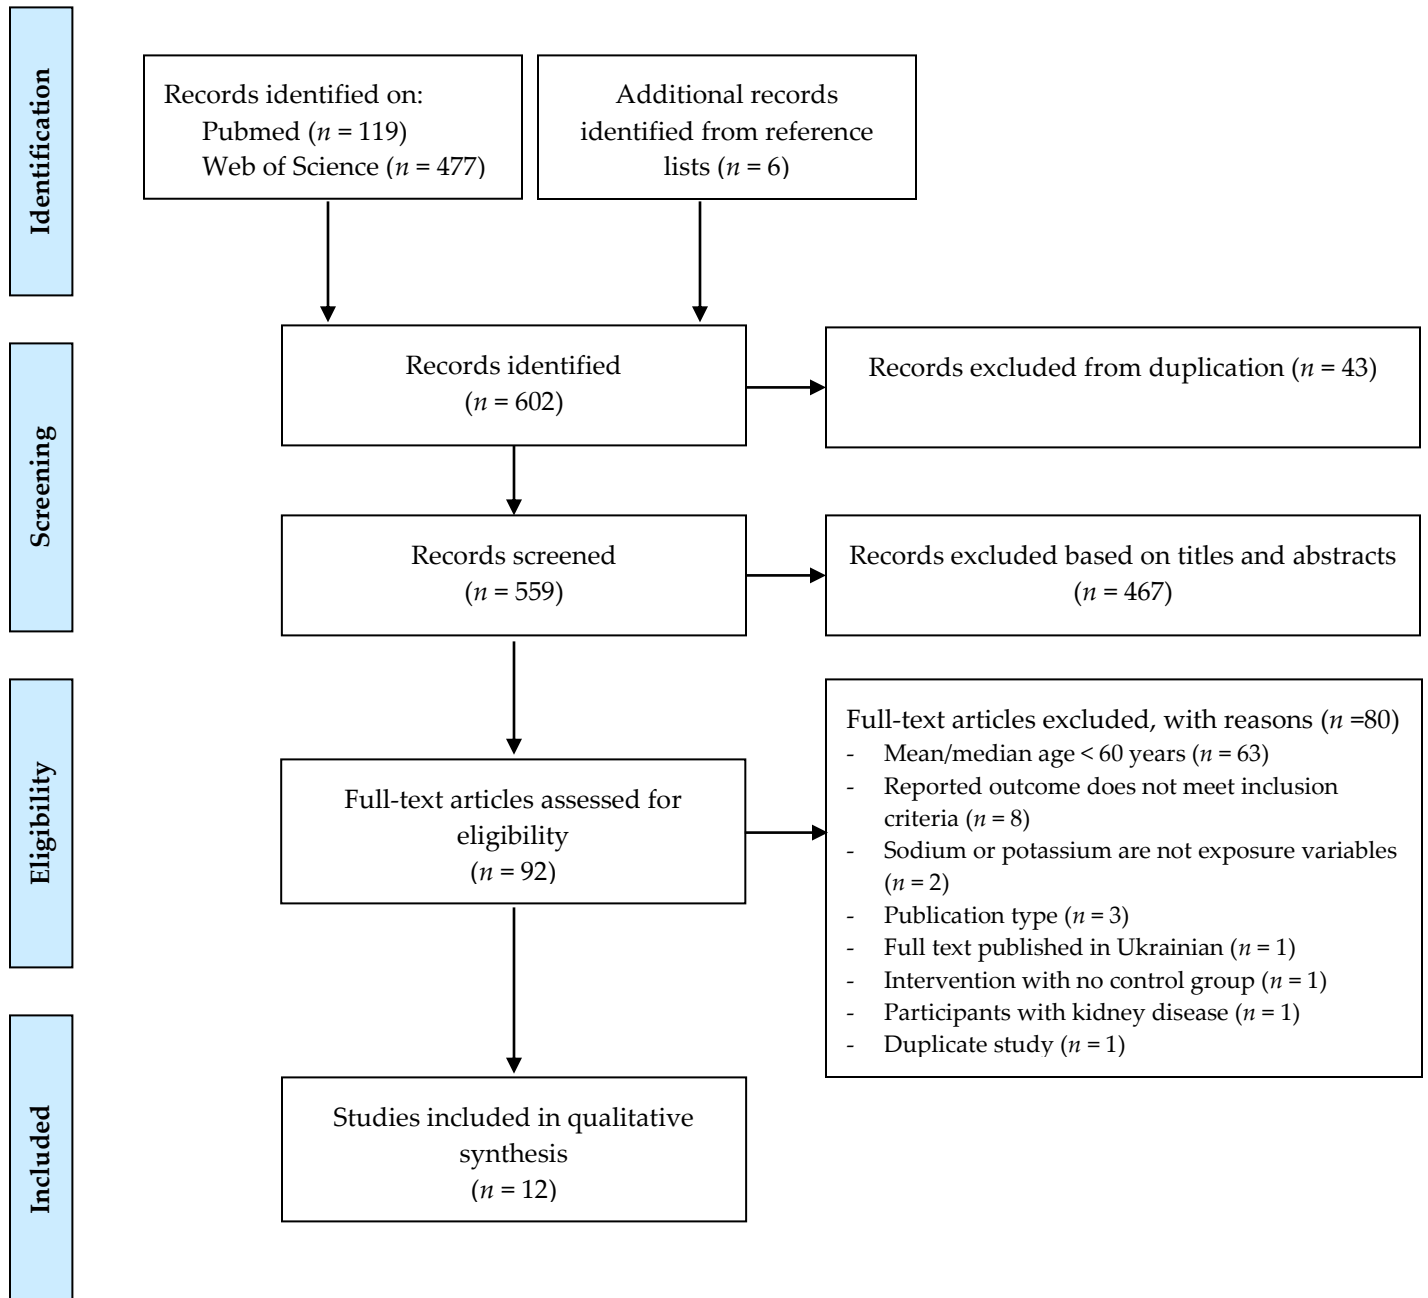

From: Moher D, Liberati A, Tetzlaff J, Altman DG, The PRISMA Group (2009). Preferred Reporting Items for Systematic Reviews and Meta-Analyses: The PRISMA Statement. PLoS Med 6(7): e1000097. doi:10.1371/journal.pmed1000097

For more information, visit [www.prisma-statement.org](http://www.prisma-statement.org).
